# Supplementary material
Source: publisher figshare collection journal article supplement (https://rs.figshare.com/ndownloader/files/6372030)
Supplement: Supplementary file 1 [file 6372030]

## **Electronic Supplementary Material, Biology Letters**

### **Androgens predict parasitism in female meerkats: a new perspective on a classic trade-off**

Kendra N. Smyth, Lydia K. Greene, Tim Clutton-Brock, Christine M. Drea

- Results: Relationships between social and reproductive status and FAM concentrations
- Table S1: Factors associated with infection status in female meerkats
- Table S2: Factors associated with parasite abundance in female meerkats
- References

#### **Results: Relationships between social and reproductive status and FAM concentrations**

For all females, the mean FAM concentration was  $73.28 \text{ ng/g} \pm 7.40$ . In line with our previous study (1), FAM concentrations were greater in dominant (mean  $\pm$  SE:  $104.91 \text{ ng/g} \pm 16.46$ ) compared to subordinate (mean  $\pm$  SE:  $59.13 \text{ ng/g} \pm 6.77$ ) females ( $t_{53} = 2.71$ ,  $P = 0.009$ ); however, FAM concentrations varied widely between individual females of the same status (dominant T range: 19.55 - 279.43 ng/g; subordinate T range: 4.43 - 191.55 ng/g). In contrast to our previous findings (1), female FAM concentrations did not vary by reproductive state ( $P > 0.05$ ) and this likely owes to the smaller sample size of the current, versus the previous, study.

**Table S1.** Factors associated with infection status in female meerkats (as determined by GLMs and GLMMs).

| Parasite                                     | Predictor <sup>a</sup> | Estimate (SE)        | $\chi^2$ <sup>b</sup> | <i>p</i>       |
|----------------------------------------------|------------------------|----------------------|-----------------------|----------------|
| <i>Toxocara suricattae</i> <sup>c</sup>      | FAM                    |                      | 0.106                 | 0.744          |
|                                              | <b>Social status</b>   | <b>1.052 (0.618)</b> | <b>2.909</b>          | <b>0.088†</b>  |
|                                              | FAM:Status             |                      | 0.207                 | 0.65           |
| Spirurida nematode <sup>d</sup>              | <b>FAM</b>             | <b>3.62 (1.39)</b>   | <b>9.6745</b>         | <b>0.002*</b>  |
|                                              | Social status          |                      | 2.791                 | 0.095          |
|                                              | FAM:Status             |                      | 2.298                 | 0.125          |
| <i>Oxynema suricattae</i> <sup>d</sup>       | <b>FAM</b>             | <b>2.556 (1.114)</b> | <b>6.646</b>          | <b>0.01*</b>   |
|                                              | <b>Social status</b>   | <b>1.71 (0.861)</b>  | <b>4.784</b>          | <b>0.029*</b>  |
|                                              | FAM:Status             |                      | 0.261                 | 0.609          |
| <i>Pseudandrya suricattae</i> <sup>d,e</sup> | <b>FAM</b>             | <b>2.74 (1.176)</b>  | <b>7.081</b>          | <b>0.008**</b> |
|                                              | Social status          |                      | 0.351                 | 0.55           |
| Coccidia <sup>d</sup>                        | <b>FAM</b>             | <b>2.836 (1.241)</b> | <b>8.44</b>           | <b>0.004**</b> |
|                                              | Social status          |                      | 0.007                 | 0.935          |
|                                              | FAM:Status             |                      | 0.674                 | 0.412          |

Note. Factors in bold were included in the final model. Variance in infection with Strongylate nematode was low and precluded statistical analysis. Significance is marked as follows: \*\* $p < 0.01$ , \* $p < 0.05$ , † $p < 0.1$ .

<sup>a</sup> Social status comparisons are made against dominant females.

<sup>b</sup>  $\chi^2$  = likelihood ratio test statistic; d.f. = 1

<sup>c</sup> Results of a GLMM with Individual as a random factor.

<sup>d</sup> Results of a GLM.

<sup>e</sup> Low prevalence precluded our analysis of the FAM and status interaction.

**Table S2.** Factors associated with parasite abundance in female meerkats (as determined by GLMs and GLMMs).

| Parasite                                   | Predictor <sup>a</sup> | Estimate (SE)         | $\chi^2$ <sup>b</sup> | p              |
|--------------------------------------------|------------------------|-----------------------|-----------------------|----------------|
| Strongylate nematode <sup>c</sup>          | FAM                    |                       | 2.211                 | 0.137          |
|                                            | Social status          |                       | 0.419                 | .517           |
|                                            | FAM:Status             |                       | 0.807                 | 0.369          |
| <i>Toxocara suricattae</i> <sup>d</sup>    | FAM                    |                       | 0.478                 | 0.49           |
|                                            | Social status          |                       | 1.357                 | 0.244          |
|                                            | FAM:Status             |                       | 1.506                 | 0.471          |
| Spirurida nematode <sup>d</sup>            | <b>FAM</b>             | <b>1.722 (0.993)</b>  | <b>3.101</b>          | <b>0.078†</b>  |
|                                            | Social status          |                       | 0.705                 | 0.401          |
|                                            | FAM:Status             |                       | 1.391                 | 0.238          |
| <i>Oxyntema suricattae</i> <sup>d</sup>    | <b>FAM</b>             | <b>1.274 (0.433)</b>  | <b>8.918</b>          | <b>0.003**</b> |
|                                            | <b>Social status</b>   | <b>0.675 (0.33)</b>   | <b>4.08</b>           | <b>0.043*</b>  |
|                                            | FAM:Status             |                       | 0.295                 | 0.587          |
|                                            | <b>Cov: Weight</b>     | <b>-0.002 (0.001)</b> | <b>5.383</b>          | <b>0.02</b>    |
| <i>Pseudandrya suricattae</i> <sup>d</sup> | <b>FAM</b>             | <b>1.614 (0.927)</b>  | <b>2.77</b>           | <b>0.096†</b>  |
|                                            | Social status          |                       | 0.056                 | 0.813          |
|                                            | FAM:Status             |                       | 0.151                 | 0.698          |
| Coccidia <sup>d</sup>                      | <b>FAM</b>             | <b>1.068 (0.346)</b>  | <b>8.902</b>          | <b>0.003**</b> |
|                                            | Social status          |                       | 0.077                 | 0.782          |
|                                            | FAM:Status             |                       | 0.093                 | 0.76           |

Note. Factors in bold were included in the final model. Significance is marked as follows: \*\* $p < 0.01$ , \* $p < 0.05$ , † $p < 0.1$ .

<sup>a</sup> Social status comparisons are made against dominant females.

<sup>b</sup>  $\chi^2$  = likelihood ratio test statistic; d.f. = 1

<sup>c</sup> Results of a GLMM with Individual as a random factor.

<sup>d</sup> Results of a GLM.

## References

1. Davies C, Smyth KN, Greene LK, Walsh D, Mitchell J, Clutton-Brock TH, Drea CM. (In Revision for Scientific Reports) Exceptional endocrine profiles characterize the meerkat: sex, status, and reproductive patterns.
